# Supplementary material for: FTO Is Increased in Muscle During Type 2 Diabetes, and Its Overexpression in Myotubes Alters Insulin Signaling, Enhances Lipogenesis and ROS Production, and Induces Mitochondrial Dysfunction
Source: PubMed Central journal article supplement — Diabetes. 2010 Oct 13;60(1):258–68. doi: 10.2337/db10-0281 (PMC3012179; doi:10.2337/db10-0281), 2010-10-13
Supplement: supp_db10-0281_db100281onlineappendix.pdf [file supp_db10-0281_db100281onlineappendix.pdf]

## SUPPLEMENTAL MATERIALS

### Supplementary Table 1: Sequences of primers

ACC1 – S: GAG-CAA-GGG-ATA-AGT-TTG-AG  
ACC1 – AS: AGG-TGC-ATC-TTG-TGA-TTA-GC

ATP5B-S: TGT-GTT-TGC-TGG-TGT-TGG-TG  
ATP5B-AS: ATC-TTG-ACC-TTC-TTG-GTC-TCT-G

FAS – S: CAC-AGG-CAG-AAG-CTG-TAC-AC  
FAS – AS: ATG-TTC-TCC-ACG-GCA-GTG-TC

FTO – S: GAG-TTT-GAG-TGG-CTG-AGG-CA  
FTO – AS: GGG-AGC-CCC-TCT-CTT-TTA-AC

GPAT – S: CTA-CGA-AGG-AGG-TTG-ATT-GC  
GPAT – AS: CTG-TGT-CTG-TAG-AGG-AGC-AG

HPRT – S: TTG-CTG-ACC-TGC-TGG-ATT-AC  
HPRT – AS: AGT-TGA-GAG-ATC-ATC-TCC-AC

PGC1 $\alpha$  – S: TCC-TCT-GAC-CCC-AGA-GTC-AC  
PGC1 $\alpha$  – AS: CTT-GGT-TGG-CTT-TAT-GAG-GAG-G

PPAR $\gamma$  - S: TCT-CTC-CGT-AAT-GGA-AGA-CC  
PPAR $\gamma$  - AS: GCA-TTA-TGA-GAC-ATC-CCC-AC

SOD2-S: TGC-TGC-TTG-TCC-AAA-TCA-GG  
SOD2-AS: ACT-GAA-GGT-AGT-AAG-CGT-GC

TBP-S: TGG-TGT-GCA-CAG-GAG-CCA-AG  
TBP-AS: TTC-ACA-TCA-CAG-CTC-CCC-AC

UQCR-S: CCA-AGC-CTC-AGG-ATG-GAC-AAG  
UQCR-AS: TCA-CCT-GTG-CCA-CTC-CAG-CTA-C

**Supplementary Table 2: Clinical and metabolic characteristics of the subjects before and after Rosiglitazone treatment.**

|                                      | Type 2 diabetic subjects |                 |
|--------------------------------------|--------------------------|-----------------|
|                                      | Before treatment         | After treatment |
| n                                    | 6                        |                 |
| Men/Women                            | 3/3                      |                 |
| Age (years)                          | 52.6 ± 2.9               |                 |
| BMI (kg/m <sup>2</sup> )             | 29.5 ± 6.9               | 30.1 ± 0.7      |
| Glucose (mmol/L)                     | 6.9 ± 0.4                | 6.3 ± 0.6       |
| Insulin (pmol/L)                     | 12.3 ± 2.0               | 9.8 ± 1.1       |
| Triglycerides (mmol/L)               | 1.3 ± 0.2                | 1.3 ± 0.4       |
| Non esterified fatty acid (μmol/L)   | 522.1 ± 59.9             | 422.0 ± 62.8    |
| Glucose disposal rate (mg/(kg.min))  | 5.58 ± 0.85              | 7.81 ± 0.84*    |
| Glucose oxidation rate (mg/(kg.min)) | 0.49 ± 0.23              | 1.35 ± 0.30 *   |
| Lipid oxidation rate (mg/(kg.min))   | 0.64 ± 0.20              | 0.53 ± 0.09     |

\* p < 0.05 when comparing type 2 diabetic subjects after rosiglitazone treatment with the same subjects before treatment
